# Supplementary material for: Combinational Immunotherapy with Allo-DRibble Vaccines and Anti-OX40 Co-Stimulation Leads to Generation of Cross-Reactive Effector T Cells and Tumor Regression
Source: PubMed Central journal article supplement (PMC5118714; doi:10.1038/srep37558), 2016-11-22

# **Combinational Immunotherapy with Allo-DRibble Vaccines and Anti-OX40 Co-Stimulation Leads to Generation of Cross-Reactive Effector T Cells and Tumor Regression**

Guangjie Yu<sup>1,2\*</sup>, Yuhuan Li<sup>2\*</sup>, Zhihua Cui<sup>2</sup>, Nicholas P. Morris<sup>2</sup>, Andrew D. Weinberg<sup>2</sup>, Bernard A. Fox<sup>2</sup>, Walter J. Urba<sup>2</sup>, Lixin Wang<sup>1</sup>, Hong-Ming Hu<sup>2</sup>

<sup>1</sup>School of Medicine, Southeast University, Nanjing, PR China <sup>2</sup>Robert W. Franz Cancer Research Center, Earle A. Chiles Research Institute, Providence Portland Medical Center, Portland, OR, USA

**Keywords:** Allo-DRibble vaccines, anti-OX40, SLiPs, Cancer vaccines, Immune responses to cancer

**Corresponding Authors:** Lixin Wang, 87 Dingjiaqiao St., Nanjing, Jiangsu, PR China, 210009. Phone: 86-25-83272503, Fax: 86-25-83324887. Hong-Ming Hu, 2N81 North Pavilion, 4805 N.E. Glisan St., Portland, OR 97213. Phone: 1-503-215-6531, Fax: 1-503-215-6841. E-mail: [lxwang@seu.edu.cn](mailto:lxwang@seu.edu.cn); [hongming.hu@providence.org](mailto:hongming.hu@providence.org).

\*These authors contributed equally to this work.

## **Other Authors:**

Guangjie Yu: [guangjie1113@gmail.com](mailto:guangjie1113@gmail.com)    Yuhuan Li: [yuhuan.li@providence.org](mailto:yuhuan.li@providence.org)

Zhihua Cui: [zhihua.cui@providence.org](mailto:zhihua.cui@providence.org)    Nicholas P. Morris: [nicholas.morris@providence.org](mailto:nicholas.morris@providence.org)

Andrew D. Weinberg: [andrew.weinberg@providence.org](mailto:andrew.weinberg@providence.org)

Bernard A. Fox: [bfox@providence.org](mailto:bfox@providence.org)    Walter J. Urba: [walter.urba@providence.org](mailto:walter.urba@providence.org)

## Supplementary data

**Figure S1 Anti-OX40 co-stimulation promoted the proliferation and expansion of memory precursor (MPEC), transitional cells, short-lived memory T cells (SLEC), and memory T cells.**

**Figure S2 Purification of DRiPs from tumor cells with a Vx3GFP fusion protein.**

(A) A schematic representation of Vx3GFP, a fusion protein comprising an engineered, novel, tandem ubiquitin-interacting motifs (tUIMs-Vx3) and GFP, binds polyubiquitinated proteins with high affinity and selectivity toward lys63 linkage. (B) Efficient isolation of polyubiquitinated proteins (DRiPs) from lysate of tumor cells that were pretreated with a proteasome inhibitor. 10, 30, 100 $\mu$ g Vx3GFP protein were added to C57MG lysate and DRiPs were pulled down with Ni-Sepharose excel resin. The flow through fraction was saved and DRiPs binding the resin were washed with Tris-NaCl buffer containing 5mM imidazole. Bound DRiPs were eluted with Tris-NaCl buffer containing 250mM imidazole. Samples from input, flow through, and elution were separated by SDS-PAGE and purification of DRiPs was demonstrated by western blot analysis with rabbit anti-ubiquitin antibody (1:2,000; Sigma).

**Figure S3 Isolated DRiPs stimulate antigen-specific T-cell proliferation efficiently when loaded onto dendritic cells.**

To determine whether they could stimulate antigen-specific T cell proliferation, we isolated DRiPs from B78H1 cells that expressed R-GFP-OVA protein after pretreatment with bortezomib. DRiPs from B78H1 cells that express GFP, but not OVA, and liver tissues were included as specificity

controls. Mutu-1940 DCs were loaded with aluminum nanoparticles plus the indicated amount of DRiPs. CFSE-labeled OT-I transgenic T cells were added after a 6-hour incubation. T-cell activation was assessed by flow cytometry analysis of CFSE dilution of labeled T cells at day 6. Mutu-1940 DCs pulsed with antigen-expressing ubiquitinated DRiPs were efficient stimulators of OT-I CD8<sup>+</sup> T cells. Ubiquitinated DRiPs from normal liver tissue or antigen-free B78H1 cells barely stimulated OT-I CD8<sup>+</sup> T cells. \*,  $P < 0.05$ ; \*\*,  $P < 0.01$ .

**Figure S4 Schematic illustration of a possible pathway for the selective accumulation of DRiPs and generation of DRibbles.**

# Supplementary Figure 1

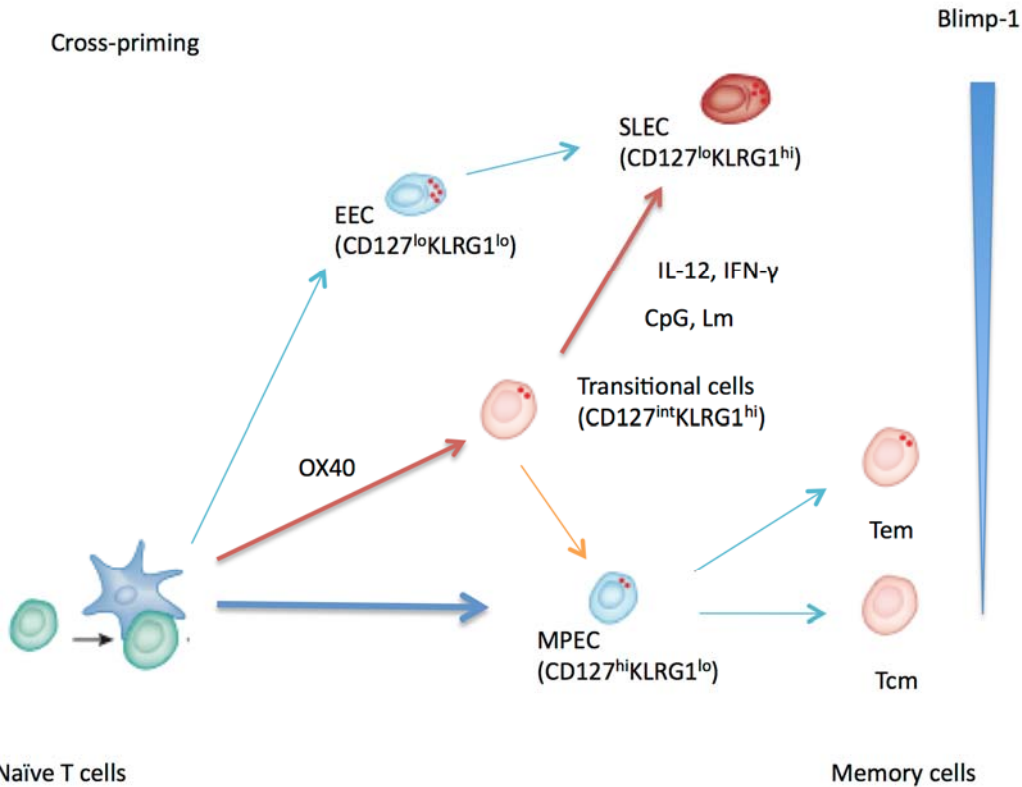

# Supplementary Figure 2

**A**

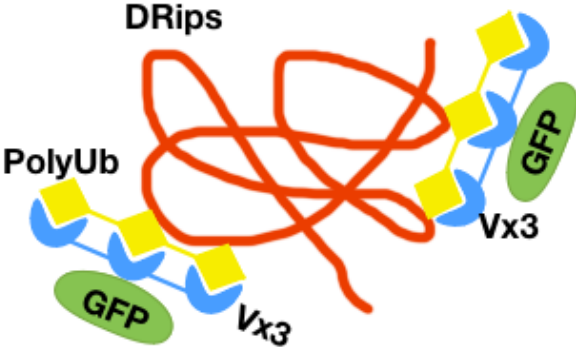

**B**

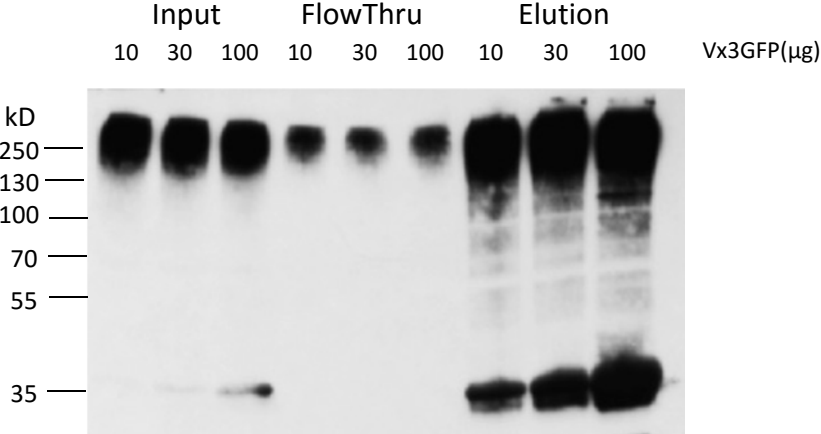

### Supplementary Figure 3

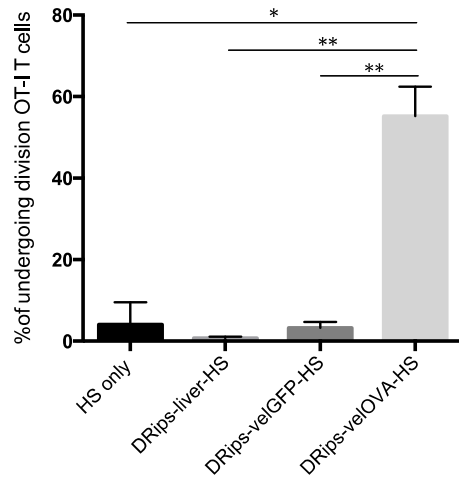

# Supplementary Figure 4

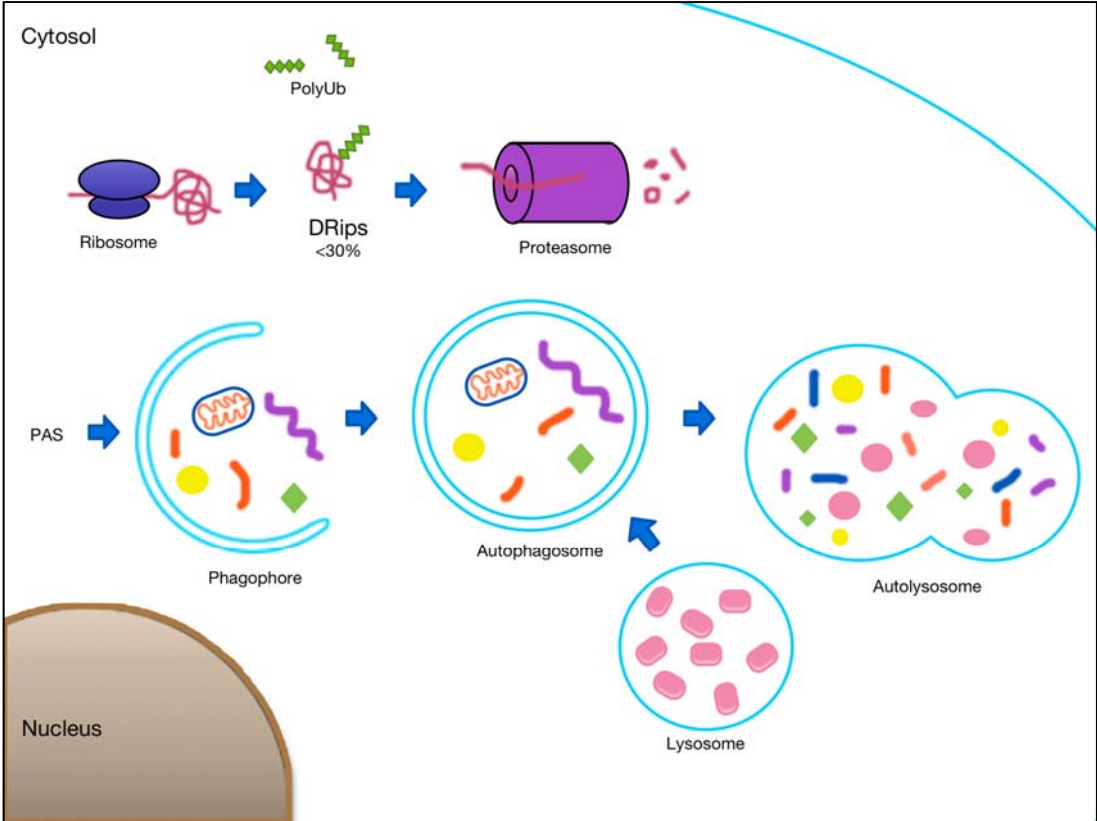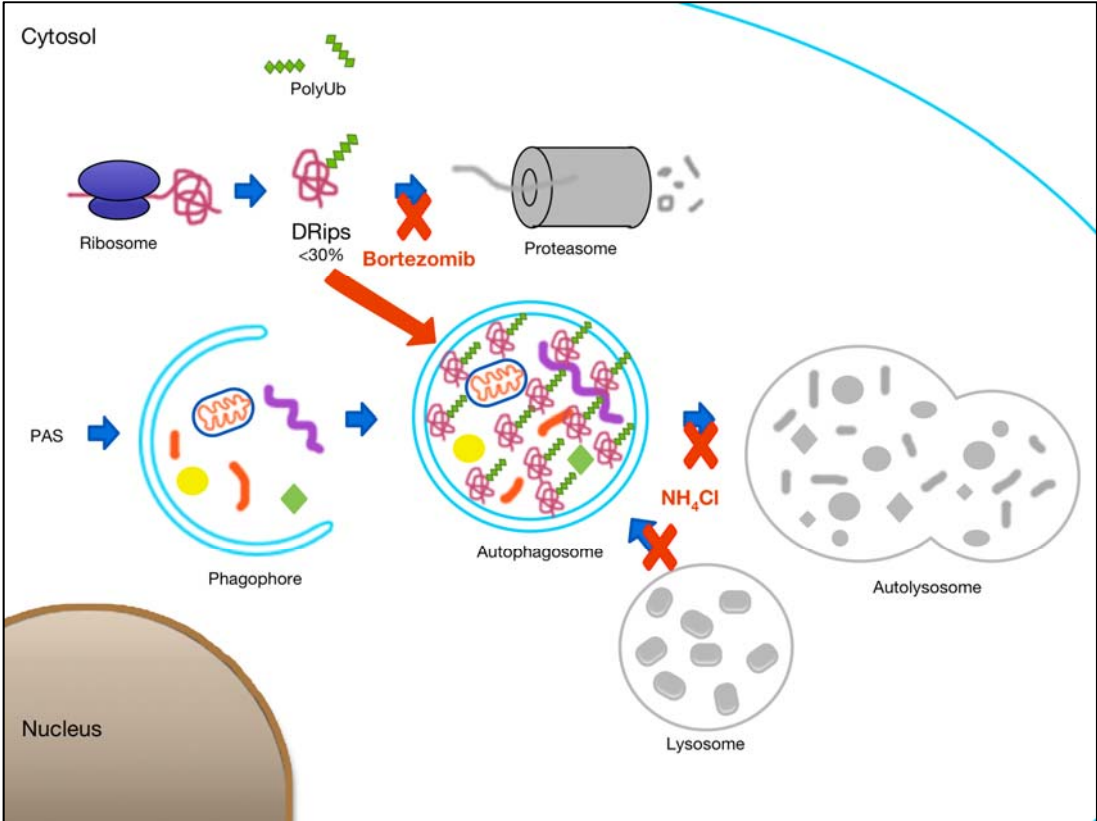

Supplement: srep37558-s1.pdf [file srep37558-s1.pdf]
